# Supplementary material
Source: PubMed Central journal article supplement (PMC3807533)
Supplement: Supp_Fig2.pdf [file Supp_Fig2.pdf]

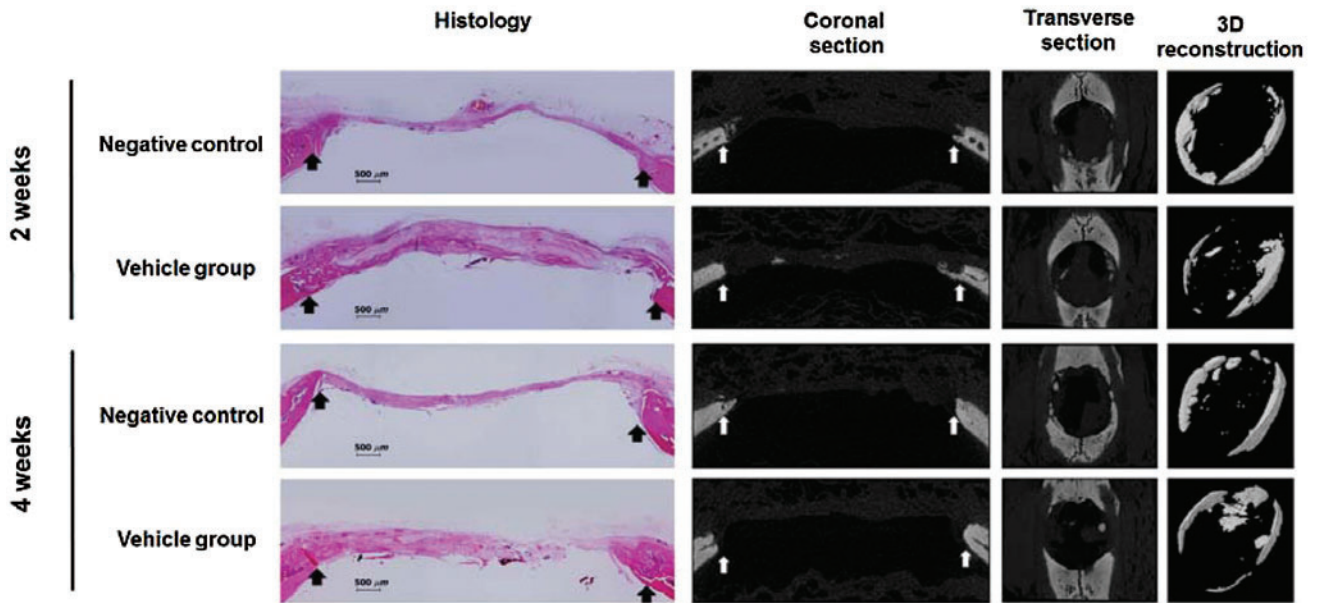

**SUPPLEMENTARY FIG. S2.** Representative histology and micro-CT images of the negative control and the vehicle groups at 2 and 4 weeks after surgery (decalcified; H&E stain; original magnification 2×). Both the negative control and vehicle groups showed limited bone regeneration at the defect margin. Micro-CT images: left, coronal section view; middle, transverse view; right, 3D reconstruction of newly formed bone in the defect site; arrow, margin of defect. micro-CT, micro-computed tomography.
