# Supplementary material
Source: PubMed Central journal article supplement (PMC3807533)
Supplement: Supp_Table1.pdf [file Supp_Table1.pdf]

SUPPLEMENTARY TABLE S1. GENE-SPECIFIC PRIMERS FOR QUANTITATIVE REAL-TIME POLYMERASE CHAIN REACTION

| <i>Gene</i>    | <i>Primer</i>                                                                   |
|----------------|---------------------------------------------------------------------------------|
| <i>Gapdh</i>   | Forward: 5'-ACCACAGTCCATGCCATCAC-3'<br>Reverse: 5'-TCCACCACCCTGTTGCTGTA-3'      |
| <i>Alp</i>     | Forward: 5'-GAGATGGTATGGGCGTCTC-3'<br>Reverse: 5'-GTTGGTGTGTACGTCTTGGA-3'       |
| <i>Ibsp</i>    | Forward: 5'-GATAGTTCGGAGGAGGAGGG-3'<br>Reverse: 5'-CTAACTCCAACCTTCCAGCGT-3'     |
| <i>Runx-2</i>  | Forward: 5'-GTGCGGTGCAAACCTTCTCC-3'<br>Reverse: 5'-TGACTCGGTTGGTCTCGG-3'        |
| <i>Dlx5</i>    | Forward: 5'-GCGCTCAACCCATACCAG-3'<br>Reverse: 5'-ACTCGGGACTCGGTTGTAGG-3'        |
| <i>Bmpr1a</i>  | Forward: 5'-GGTTCAGCGAACTATTGCCAAA-3'<br>Reverse: 5'-TCACCACGCCATTTACCCA-3'     |
| <i>Bmpr1l</i>  | Forward: 5'-TACAACACCACTCAGTCCGC-3'<br>Reverse: 5'-CCTGTCTCCTGTCAACATTCTG-3'    |
| <i>Noggin</i>  | Forward: 5'-CACTATCTACACATCCGCCAG-3'<br>Reverse: 5'-AGCGTCTCGTTCAGATCCTTCT-3'   |
| <i>Gremlin</i> | Forward: 5'-CCAGCGCTGAAGGGAAAAAGAAA-3'<br>Reverse: 5'-TGGCCGTAACAGAAGCGATTGA-3' |
