# Supplementary material
Source: PubMed Central journal article supplement (PMC3807533)
Supplement: Supp_Table2.pdf [file Supp_Table2.pdf]

SUPPLEMENTARY TABLE S2. THE RESULTS OF IN VIVO EXPERIMENT

|                                           |         | <i>Negative controls</i> | <i>Vehicle</i> | <i>Cells</i> | <i>rhPDGF-BB</i> | <i>Cells/BMP2</i>        | <i>Cells/BMP2/rhPDGF-BB</i> |
|-------------------------------------------|---------|--------------------------|----------------|--------------|------------------|--------------------------|-----------------------------|
| Bone area (mm <sup>2</sup> )              | 2 weeks | 0.59±0.19                | 0.45±0.22      | 0.63±0.29    | 0.46±0.16        | 3.18±2.66 <sup>a</sup>   | 4.39±2.86 <sup>a</sup>      |
|                                           | 4 weeks | 0.41±0.21                | 0.61±0.35      | 1.00±0.31    | 0.75±0.48        | 2.71±1.67                | 5.53±2.71 <sup>b</sup>      |
| Defect closure (%)                        | 2 weeks | 14.45±8.23               | 11.02±4.93     | 14.88±7.97   | 11.53±4.01       | 48.60±30.90 <sup>a</sup> | 63.75±22.94 <sup>a</sup>    |
|                                           | 4 weeks | 10.11±2.01               | 14.60±7.89     | 27.19±13.70  | 18.85±12.01      | 51.22±10.61              | 79.68±17.64 <sup>b</sup>    |
| Bone volume/Tissue volume (%)             | 2 weeks | 9.12±1.96                | 9.03±2.20      | 7.18±4.12    | 7.38±0.15        | 43.87±15.90 <sup>a</sup> | 39.92±7.74 <sup>a</sup>     |
|                                           | 4 weeks | 5.66±2.76                | 7.23±1.80      | 17.81±3.77   | 14.52±6.69       | 48.79±2.01 <sup>a</sup>  | 40.12±4.19 <sup>a</sup>     |
| Bone mineral density (g/cm <sup>3</sup> ) | 2 weeks | 0.79±0.01                | 0.68±0.03      | 0.63±0.04    | 0.67±0.14        | 0.68±0.01                | 0.62±0.04                   |
|                                           | 4 weeks | 0.86±0.01                | 0.82±0.02      | 0.83±0.04    | 0.84±0.01        | 0.74±0.05 <sup>c</sup>   | 0.85±0.03                   |

Values represent mean±SD of six samples.

<sup>a</sup>Statistically different from the negative control, vehicle, rhPDGF-BB, and cell group analysis of variance (ANOVA,  $p < 0.05$ ).

<sup>b</sup>Statistically different from the other groups (ANOVA,  $p < 0.05$ ).

<sup>c</sup>Statistically different from the negative control, vehicle, rhPDGF-BB, and cells/BMP2/rhPDGF-BB groups (ANOVA,  $p < 0.05$ ).
